# Supplementary material for: A numerical sensitivity study on the snow-darkening effect by black carbon deposition over the Arctic in spring
Source: Copernicus journal article supplement (doi:10.5194/acp-25-1-2025), 2025-01-03
Supplement: Supplementary file 1 [file acp-25-1-2025-supplement.pdf]

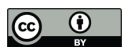

*Supplement of*

## **A numerical sensitivity study on the snow-darkening effect by black carbon deposition over the Arctic in spring**

**Zilu Zhang et al.**

*Correspondence to:* Libo Zhou (zhoulibo@mail.iap.ac.cn) and Meigen Zhang (mgzhang@mail.iap.ac.cn)

The copyright of individual parts of the supplement might differ from the article licence.

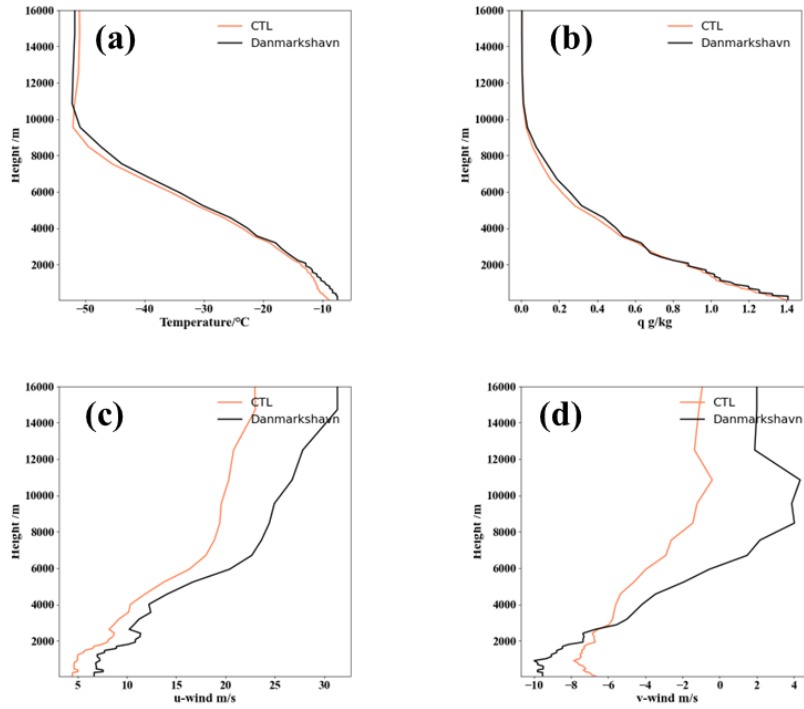

**Figure S1.** Vertical profiles of simulated (in orange lines) and observed (in black lines) (a) temperature ( $^{\circ}\text{C}$ ), (b) specific humidity ( $\text{g kg}^{-1}$ ), (c) u-wind speed ( $\text{m s}^{-1}$ ) and (d) v-wind speed ( $\text{m s}^{-1}$ ) at the Danmarkshavn station at 00:00 and 12:00 (UTC) averaged from 15 April to 15 May 2020.

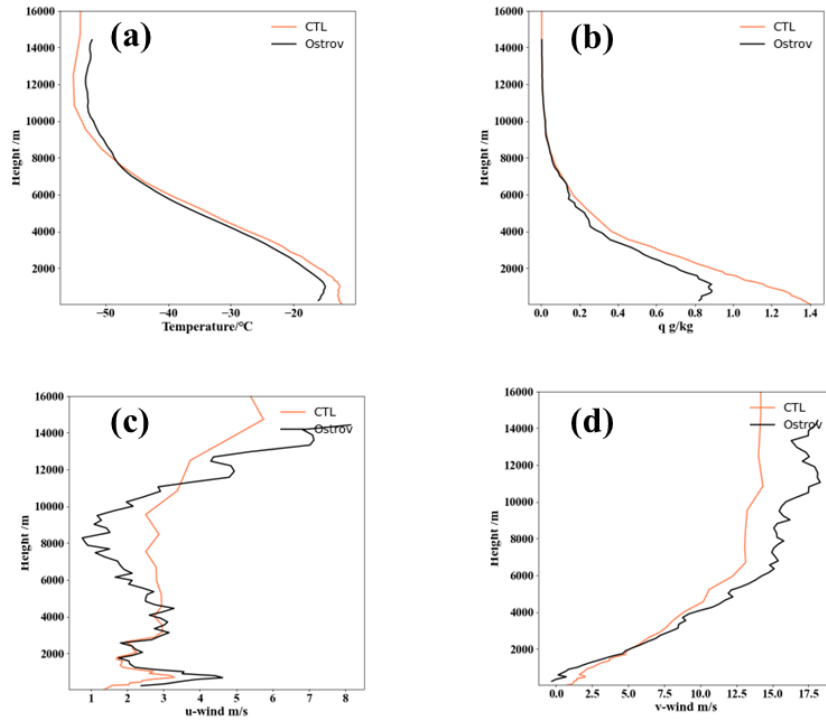

**Figure S2.** Vertical profiles of simulated (in orange lines) and observed (in black lines) (a) temperature ( $^{\circ}\text{C}$ ), (b) specific humidity ( $\text{g kg}^{-1}$ ), (c) u-wind speed ( $\text{m s}^{-1}$ ) and (d) v-wind speed ( $\text{m s}^{-1}$ ) at the Ostrov station at 00:00 and 12:00 (UTC) averaged from 15 April to 15 May 2020.

10

**Table S1.** Statistics for observed and simulated meteorological fields (T2, RH2, WS10 and WD10) from 15 April to 15 May 2020 at Barrow and Summit stations.

|                            | Barrow |      |      | Summit |      |      |
|----------------------------|--------|------|------|--------|------|------|
|                            | MB     | R    | RMSE | MB     | R    | RMSE |
| T2 ( $^{\circ}\text{C}$ )  | 2.08   | 0.97 | 2.48 | 2.58   | 0.89 | 4.88 |
| RH2 (%)                    | -2.97  | 0.81 | 5.95 | 0.59   | 0.68 | 6.06 |
| WS10 ( $\text{m s}^{-1}$ ) | -0.23  | 0.81 | 1.65 | -0.87  | 0.93 | 1.71 |
| WD10 ( $^{\circ}$ )        | -5.52  | 0.63 | 80.1 | -27.5  | 0.56 | 57.4 |

15

**Table S2. Statistics for observed and simulated surface energy balance (SW, HS, and LH) from 15 April to 15 May 2020 at Alaska.**

|                                   | <b>MB</b>    | <b>R</b>    | <b>RMSE</b>  |
|-----------------------------------|--------------|-------------|--------------|
| <b>SW (<math>W m^{-2}</math>)</b> | <b>0.24</b>  | <b>0.88</b> | <b>53.21</b> |
| <b>HS (<math>W m^{-2}</math>)</b> | <b>3.12</b>  | <b>0.57</b> | <b>17.39</b> |
| <b>LH (<math>W m^{-2}</math>)</b> | <b>-0.96</b> | <b>0.58</b> | <b>3.24</b>  |

20

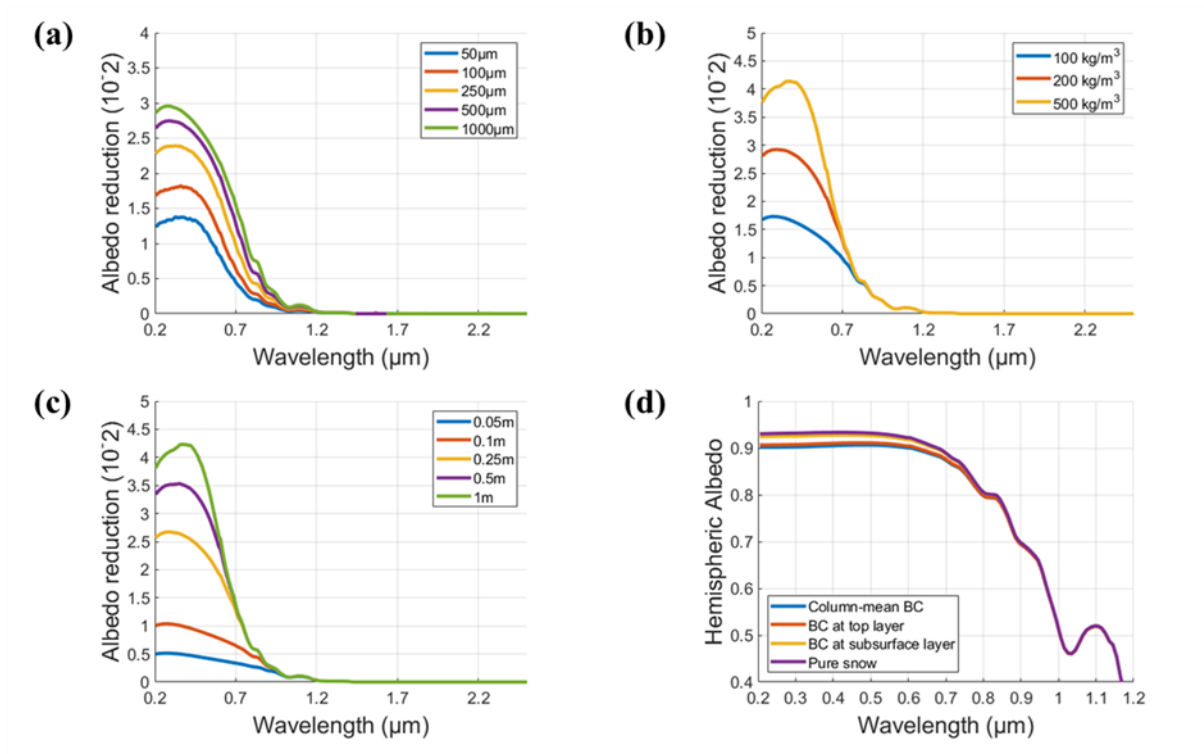

**Figure S3. Spectral albedo reduction by BC with different (a) snow effective grain radii ( $\mu m$ ), (b) snow densities ( $kg m^{-3}$ ), (c) snow depths (m), and (d) vertical profiles of BC in snow.**
